# Supplementary material for: Mg assists in modulating the dimensionalities of the anionic frameworks of borates
Source: Royal Society of Chemistry journal article supplement (doi:10.1039/d3dt03173j), 2023-01-01
Supplement: d3dt03173j1.pdf [file d3dt03173j1.pdf]

## Electronic Supplementary Information

### Mg assists in modulating the dimensionalities of the anionic frameworks of borates

Qianzhen Zhang,<sup>†a,b</sup> Feixiang Wang,<sup>†a,b</sup> Xifa Long,<sup>a,b</sup> Yun Yang<sup>\*a,b</sup>

<sup>a</sup> Research Center for Crystal Materials, CAS Key Laboratory of Functional Materials and Devices for Special Environments, Xinjiang Technical Institute of Physics & Chemistry of CAS, 40-1 South Beijing Road, Urumqi 830011, China.

<sup>b</sup> Center of Materials Science and Optoelectronics Engineering, University of Chinese Academy of Sciences, Beijing 100049, China.

<sup>†</sup> These authors contributed equally to this work.

\* Corresponding author: yangyun@ms.xjb.ac.cn.

**Table S1.** Atomic coordinates ( $\times 10^4$ ), equivalent isotropic displacement parameters ( $\text{\AA}^2 \times 10^3$ ) and the Bond Valence Sum (BVS) calculations for  $\text{Li}_4\text{Mg}_3\text{SrB}_{12}\text{O}_{24}$ . <sup>a,b</sup>  $U_{\text{eq}}$  is defined as 1/3 of the trace of the orthogonalised  $U_{ij}$  tensor.

| Atom        | x       | y       | z       | U(eq) | BVS  |
|-------------|---------|---------|---------|-------|------|
| Li(1)/Mg(1) | 1632(3) | 2332(3) | 7522(6) | 40(1) | 1.25 |
| Mg(2)       | 0       | 0       | 0       | 7(1)  | 2.15 |
| Sr(1)       | 0       | 0       | 5000    | 25(1) | 1.95 |
| B(1)        | 1434(3) | 2000(3) | 1966(6) | 11(1) | 2.96 |
| B(2)        | 3048(3) | 2763(3) | 4190(6) | 10(1) | 3.03 |
| O(1)        | 420(2)  | 1279(2) | 1879(4) | 12(1) | 1.98 |
| O(2)        | 1914(2) | 2821(2) | 584(4)  | 14(1) | 2.04 |
| O(3)        | 2040(2) | 1875(2) | 3464(4) | 14(1) | 1.96 |
| O(4)        | 2969(2) | 2951(2) | 6346(4) | 11(1) | 2.07 |

<sup>a</sup> Bond valences calculated with the program Bond Valence Calculator Version 2.00, Hormillosa, C., Healy, S., Stephen, T. McMaster University (1993).

<sup>b</sup> Valence sums calculated with the formula:  $S_i = \exp[(R_0 - R_i)/B]$ , where  $S_i$  = valence of bond "i" and  $B = 0.37$ .

**Table S2.** Bond lengths ( $\text{\AA}$ ) and bond angles ( $^\circ$ ) of  $\text{Li}_4\text{Mg}_3\text{SrB}_{12}\text{O}_{24}$ .

| Chemical bond       | Bond length | Chemical bond | Bond length |
|---------------------|-------------|---------------|-------------|
| Li(1)/Mg(1)-O(1)#1  | 2.012       | Sr(1)-O(1)#5  | 2.631(2)    |
| Li(1)/Mg(1)-O(2)#16 | 2.089       | Sr(1)-O(1)    | 2.631(3)    |
| Li(1)/Mg(1)-O(2)#14 | 2.592       | Sr(1)-O(3)#1  | 3.076(2)    |
| Li(1)/Mg(1)-O(3)#5  | 2.093       | Sr(1)-O(3)#3  | 3.076(2)    |
| Li(1)/Mg(1)-O(4)    | 1.881       | Sr(1)-O(3)#5  | 3.076(2)    |
| Mg(2)-O(1)          | 2.072(2)    | Sr(1)-O(3)#4  | 3.076(2)    |
| Mg(2)-O(1)#4        | 2.072(2)    | Sr(1)-O(3)    | 3.076(2)    |
| Mg(2)-O(1)#6        | 2.072(2)    | Sr(1)-O(3)#2  | 3.076(2)    |
| Mg(2)-O(1)#7        | 2.072(2)    | B(1)-O(1)     | 1.341(4)    |
| Mg(2)-O(1)#3        | 2.072(2)    | B(1)-O(2)     | 1.388(4)    |
| Mg(2)-O(1)#8        | 2.072(2)    | B(1)-O(3)     | 1.400(4)    |
| Sr(1)-O(1)#1        | 2.631(3)    | B(2)#9-O(2)   | 1.506(4)    |

| Sr(1)-O(1)#2                | 2.631(3)   | B(2)-O(3)           | 1.491(4)   |
|-----------------------------|------------|---------------------|------------|
| Sr(1)-O(1)#3                | 2.631(2)   | B(2)#10-O(4)        | 1.454(4)   |
| Sr(1)-O(1)#4                | 2.631(3)   | B(2)-O(4)           | 1.446(4)   |
| Chemical bond               | Bond angle | Chemical bond       | Bond angle |
| O(1)#1-Li(1)/Mg(1)-O(2)#16  | 95.2(2)    | O(1)-Sr(1)-O(3)#4   | 65.76(7)   |
| O(1)#1-Li(1)/Mg(1)-O(2)#14  | 158.6(2)   | O(1)#5-Sr(1)-O(3)#5 | 47.70(7)   |
| O(1)#1-Li(1)/Mg(1)-O(3)#5   | 98.95(19)  | O(1)#4-Sr(1)-O(3)#2 | 70.63(7)   |
| O(2)#16-Li(1)/Mg(1)-O(2)#14 | 97.67(17)  | O(1)#2-Sr(1)-O(3)#5 | 109.37(7)  |
| O(2)#16-Li(1)/Mg(1)-O(3)#5  | 111.73(19) | O(1)#1-Sr(1)-O(3)#3 | 114.24(7)  |
| O(3)#5-Li(1)/Mg(1)-O(2)#14  | 60.34(13)  | O(1)#2-Sr(1)-O(3)#2 | 47.70(7)   |
| O(4)-Li(1)/Mg(1)-O(1)#1     | 104.3(2)   | O(1)#1-Sr(1)-O(3)#1 | 47.70(7)   |
| O(4)-Li(1)/Mg(1)-O(2)#14    | 89.14(18)  | O(1)#4-Sr(1)-O(3)   | 109.37(7)  |
| O(4)-Li(1)/Mg(1)-O(2)#16    | 103.8(2)   | O(1)#4-Sr(1)-O(3)#1 | 132.30(7)  |
| O(4)-Li(1)/Mg(1)-O(3)#5     | 135.1(2)   | O(1)#3-Sr(1)-O(3)   | 65.76(7)   |
| O(1)#7-Mg(2)-O(1)#3         | 180.00(11) | O(1)#5-Sr(1)-O(3)#1 | 109.37(7)  |
| O(1)-Mg(2)-O(1)#3           | 88.78(10)  | O(1)-Sr(1)-O(3)     | 47.70(7)   |
| O(1)#8-Mg(2)-O(1)#4         | 91.22(10)  | O(1)#3-Sr(1)-O(3)#1 | 70.63(7)   |
| O(1)-Mg(2)-O(1)#4           | 88.78(10)  | O(1)#4-Sr(1)-O(3)#5 | 114.24(7)  |
| O(1)-Mg(2)-O(1)#6           | 91.22(10)  | O(1)#2-Sr(1)-O(3)#1 | 65.76(7)   |
| O(1)#7-Mg(2)-O(1)#4         | 91.22(10)  | O(1)#3-Sr(1)-O(3)#5 | 132.30(7)  |
| O(1)#8-Mg(2)-O(1)#7         | 88.78(10)  | O(1)-Sr(1)-O(3)#1   | 114.24(7)  |
| O(1)-Mg(2)-O(1)#7           | 91.22(10)  | O(1)-Sr(1)-O(3)#5   | 70.63(7)   |
| O(1)#8-Mg(2)-O(1)#6         | 88.78(10)  | O(1)#1-Sr(1)-O(3)#4 | 132.30(7)  |
| O(1)#8-Mg(2)-O(1)#3         | 91.22(10)  | O(1)#4-Sr(1)-O(3)#3 | 65.76(7)   |
| O(1)#3-Mg(2)-O(1)#6         | 91.22(10)  | O(1)#4-Sr(1)-O(3)#4 | 47.70(7)   |
| O(1)#3-Mg(2)-O(1)#4         | 88.78(10)  | O(1)#3-Sr(1)-O(3)#3 | 47.70(7)   |
| O(1)#7-Mg(2)-O(1)#6         | 88.78(10)  | O(1)#5-Sr(1)-O(3)#4 | 70.63(7)   |
| O(1)#6-Mg(2)-O(1)#4         | 180.0(2)   | O(1)-Sr(1)-O(3)#3   | 109.37(7)  |
| O(1)#8-Mg(2)-O(1)           | 180.0      | O(1)#3-Sr(1)-O(3)#4 | 109.37(7)  |
| O(1)#1-Sr(1)-O(1)#4         | 180.0      | O(1)#1-Sr(1)-O(3)   | 70.63(7)   |
| O(1)#5-Sr(1)-O(1)#2         | 66.86(8)   | O(3)#1-Sr(1)-O(3)#5 | 109.98(4)  |
| O(1)#5-Sr(1)-O(1)           | 113.14(8)  | O(3)#1-Sr(1)-O(3)   | 70.02(4)   |
| O(1)#1-Sr(1)-O(1)#5         | 66.86(8)   | O(3)-Sr(1)-O(3)#3   | 109.98(4)  |
| O(1)#1-Sr(1)-O(1)           | 113.14(8)  | O(3)#4-Sr(1)-O(3)#5 | 70.02(4)   |
| O(1)#4-Sr(1)-O(1)#5         | 113.14(8)  | O(3)#4-Sr(1)-O(3)   | 109.98(4)  |

|                     |           |                     |           |
|---------------------|-----------|---------------------|-----------|
| O(1)#4-Sr(1)-O(1)#2 | 113.14(8) | O(3)#2-Sr(1)-O(3)#5 | 109.98(4) |
| O(1)#1-Sr(1)-O(1)#3 | 113.14(8) | O(3)#1-Sr(1)-O(3)#4 | 180.0     |
| O(1)#3-Sr(1)-O(1)#2 | 113.14(8) | O(3)-Sr(1)-O(3)#5   | 70.02(4)  |
| O(1)#4-Sr(1)-O(1)#3 | 66.86(8)  | O(3)#1-Sr(1)-O(3)#3 | 70.02(4)  |
| O(1)#4-Sr(1)-O(1)   | 66.86(8)  | O(3)#2-Sr(1)-O(3)   | 180.0     |
| O(1)#5-Sr(1)-O(1)#3 | 180.0     | O(3)#2-Sr(1)-O(3)#3 | 70.02(4)  |
| O(1)#3-Sr(1)-O(1)   | 66.86(8)  | O(3)#1-Sr(1)-O(3)#2 | 109.98(4) |
| O(1)#1-Sr(1)-O(1)#2 | 66.86(8)  | O(3)#5-Sr(1)-O(3)#3 | 180.00(3) |
| O(1)#2-Sr(1)-O(1)   | 180.0     | O(3)#4-Sr(1)-O(3)#2 | 70.02(4)  |
| O(1)#3-Sr(1)-O(3)#2 | 114.24(7) | O(3)#4-Sr(1)-O(3)#3 | 109.98(4) |
| O(1)#5-Sr(1)-O(3)#3 | 132.30(7) | O(1)-B(1)-O(2)      | 123.4(3)  |
| O(1)#1-Sr(1)-O(3)#2 | 109.37(7) | O(1)-B(1)-O(3)      | 117.5(3)  |
| O(1)-Sr(1)-O(3)#2   | 132.30(7) | O(2)-B(1)-O(3)      | 119.0(3)  |
| O(1)#2-Sr(1)-O(3)#4 | 114.24(7) | O(3)-B(2)-O(2)#10   | 106.1(3)  |
| O(1)#5-Sr(1)-O(3)   | 114.24(7) | O(4)-B(2)-O(2)#10   | 109.4(3)  |
| O(1)#5-Sr(1)-O(3)#2 | 65.76(7)  | O(4)#9-B(2)-O(2)#10 | 111.6(3)  |
| O(1)#2-Sr(1)-O(3)   | 132.30(7) | O(4)-B(2)-O(3)      | 109.6(3)  |
| O(1)#2-Sr(1)-O(3)#3 | 70.63(7)  | O(4)#9-B(2)-O(3)    | 110.5(3)  |
| O(1)#1-Sr(1)-O(3)#5 | 65.76(7)  | O(4)-B(2)-O(4)#9    | 109.6(3)  |

Symmetry transformations used to generate equivalent atoms:

|                              |                              |                              |
|------------------------------|------------------------------|------------------------------|
| #1 $y, -x+y, -z+1$           | #2 $-x, -y, -z+1$            | #3 $-x+y, -x, z$             |
| #4 $-y, x-y, z$              | #5 $x-y, x, -z+1$            | #6 $y, -x+y, -z$             |
| #7 $x-y, x, -z$              | #8 $-x, -y, -z$              | #9 $-x+y+1/3, -x+2/3, z-1/3$ |
| #10 $-y+2/3, x-y+1/3, z+1/3$ | #14 $-x+1/3, -y+2/3, -z+2/3$ | #16 $x, y, z+1$              |

**Table S3.** Anisotropic displacement parameters ( $\text{\AA}^2 \times 10^3$ ) for  $\text{Li}_4\text{Mg}_3\text{SrB}_{12}\text{O}_{24}$ .

| Atom        | $U^{11}$ | $U^{22}$ | $U^{33}$ | $U^{23}$ | $U^{13}$ | $U^{12}$ |
|-------------|----------|----------|----------|----------|----------|----------|
| Li(1)/Mg(1) | 28(2)    | 40(2)    | 44(2)    | -7(2)    | 4(2)     | 11(2)    |
| Mg(2)       | 7(1)     | 7(1)     | 7(1)     | 0        | 0        | 3(1)     |
| Sr(1)       | 34(1)    | 34(1)    | 7(1)     | 0        | 0        | 17(1)    |
| B(1)        | 12(2)    | 10(2)    | 8(2)     | -3(1)    | 0(1)     | 4(1)     |
| B(2)        | 11(2)    | 11(2)    | 8(2)     | -1(1)    | -1(1)    | 5(1)     |
| O(1)        | 9(1)     | 10(1)    | 15(1)    | -3(1)    | -2(1)    | 4(1)     |
| O(2)        | 11(1)    | 13(1)    | 12(1)    | 1(1)     | -2(1)    | 2(1)     |
| O(3)        | 10(1)    | 12(1)    | 15(1)    | 2(1)     | -3(1)    | 1(1)     |

|      |       |       |      |      |      |      |
|------|-------|-------|------|------|------|------|
| O(4) | 10(1) | 16(1) | 6(1) | 0(1) | 1(1) | 7(1) |
|------|-------|-------|------|------|------|------|

**Table S4.** Atomic coordinates ( $\times 10^4$ ), equivalent isotropic displacement parameters ( $\text{\AA}^2 \times 10^3$ ) and the BVS calculations for  $\text{Rb}_2\text{Mg}_3\text{B}_{16}\text{O}_{28}$ .  $U_{\text{eq}}$  is defined as 1/3 of the trace of the orthogonalised  $U_{ij}$  tensor.

| Atom   | x       | y        | z       | U(eq) | BVS  |
|--------|---------|----------|---------|-------|------|
| Rb(1A) | 7439(5) | 4922(15) | 924(4)  | 55(2) | 0.75 |
| Rb(1B) | 7533(3) | 4685(7)  | 905(3)  | 26(1) | 0.82 |
| Mg(1)  | 5000    | 7505(2)  | 2500    | 7(1)  | 1.99 |
| Mg(2)  | 9988(1) | 7536(2)  | 969(1)  | 8(1)  | 1.96 |
| B(1)   | 5636(2) | 9178(6)  | 4203(4) | 8(1)  | 3.04 |
| B(2)   | 5836(2) | 5902(6)  | 4187(4) | 8(1)  | 3.07 |
| B(3)   | 5686(2) | 4177(6)  | 5861(4) | 9(1)  | 3.09 |
| B(4)   | 6853(2) | 5368(6)  | 3431(4) | 11(1) | 3.09 |
| B(5)   | 8127(2) | 5171(6)  | 3368(4) | 12(1) | 3.08 |
| B(6)   | 9127(2) | 4207(6)  | 4145(4) | 9(1)  | 3.08 |
| B(7)   | 9107(2) | 5813(6)  | 2488(4) | 10(1) | 3.03 |
| B(8)   | 9111(2) | 9245(6)  | 2436(4) | 9(1)  | 3.00 |
| O(1)   | 5628(1) | 10671(3) | 4796(2) | 10(1) | 2.07 |
| O(2)   | 5645(1) | 9317(3)  | 3175(2) | 9(1)  | 2.02 |
| O(3)   | 5574(1) | 7541(3)  | 4646(2) | 9(1)  | 2.02 |
| O(4)   | 5575(1) | 5598(3)  | 3178(2) | 8(1)  | 1.98 |
| O(5)   | 5632(1) | 4360(4)  | 4830(2) | 10(1) | 2.02 |
| O(6)   | 5678(1) | 2541(3)  | 6295(2) | 10(1) | 2.03 |
| O(7)   | 5689(1) | 5646(3)  | 6465(2) | 10(1) | 2.08 |
| O(8)   | 6528(1) | 6021(4)  | 4228(2) | 13(1) | 1.99 |
| O(9)   | 6589(1) | 4518(4)  | 2622(2) | 12(1) | 1.96 |
| O(10)  | 7503(2) | 5661(4)  | 3496(3) | 24(1) | 2.18 |
| O(11)  | 8431(1) | 4327(4)  | 4162(2) | 15(1) | 1.82 |
| O(12)  | 8415(1) | 5654(4)  | 2504(2) | 12(1) | 2.04 |
| O(13)  | 9395(1) | 5561(3)  | 3508(2) | 8(1)  | 1.96 |
| O(14)  | 9315(1) | 7493(3)  | 2071(2) | 9(1)  | 1.96 |

**Table S5.** Selected bond lengths ( $\text{\AA}$ ) and angles ( $^\circ$ ) for  $\text{Rb}_2\text{Mg}_3\text{B}_{16}\text{O}_{28}$ .

| <b>Chemical bond</b>  | <b>Bond length</b> | <b>Chemical bond</b> | <b>Bond length</b> |
|-----------------------|--------------------|----------------------|--------------------|
| Rb(1A)-O(8)#1         | 2.971(7)           | B(1)-O(2)            | 1.360(5)           |
| Rb(1A)-O(9)           | 2.908(8)           | B(1)-O(3)            | 1.370(5)           |
| Rb(1A)-O(10)#1        | 3.219(7)           | B(2)-O(3)            | 1.487(5)           |
| Rb(1A)-O(10)          | 3.418(7)           | B(2)-O(4)            | 1.437(5)           |
| Rb(1A)-O(10)#2        | 3.303(12)          | B(2)-O(5)            | 1.501(5)           |
| Rb(1A)-O(11)#1        | 3.203(8)           | B(2)-O(8)            | 1.453(5)           |
| Rb(1A)-O(12)          | 2.918(8)           | B(3)-O(5)            | 1.363(5)           |
| Rb(1B)-O(8)#1         | 3.042(5)           | B(3)-O(6)            | 1.357(5)           |
| Rb(1B)-O(8)#2         | 3.398(8)           | B(3)-O(7)            | 1.363(5)           |
| Rb(1B)-O(9)           | 3.042(6)           | B(4)-O(8)            | 1.360(5)           |
| Rb(1B)-O(10)#1        | 3.167(5)           | B(4)-O(9)            | 1.345(6)           |
| Rb(1B)-O(10)#2        | 3.135(5)           | B(4)-O(10)           | 1.377(5)           |
| Rb(1B)-O(10)          | 3.480(6)           | B(5)-O(10)           | 1.374(5)           |
| Rb(1B)-O(11)#1        | 3.095(5)           | B(5)-O(11)           | 1.358(6)           |
| Rb(1B)-O(12)          | 2.848(5)           | B(5)-O(12)           | 1.353(5)           |
| Mg(1)-O(2)            | 2.097(3)           | B(6)-O(1)#8          | 1.471(6)           |
| Mg(1)-O(2)#3          | 2.097(3)           | B(6)-O(6)#9          | 1.499(5)           |
| Mg(1)-O(4)#3          | 2.061(3)           | B(6)-O(11)           | 1.464(5)           |
| Mg(1)-O(4)            | 2.061(3)           | B(6)-O(13)           | 1.442(5)           |
| Mg(1)-O(6)#4          | 2.156(3)           | B(7)-O(2)#2          | 1.526(5)           |
| Mg(1)-O(6)#1          | 2.156(3)           | B(7)-O(12)           | 1.454(5)           |
| Mg(2)-O(1)#2          | 2.137(3)           | B(7)-O(13)           | 1.466(5)           |
| Mg(2)-O(3)#5          | 2.154(3)           | B(7)-O(14)           | 1.452(5)           |
| Mg(2)-O(5)#6          | 2.144(3)           | B(8)-O(4)#6          | 1.466(5)           |
| Mg(2)-O(7)#5          | 2.099(3)           | B(8)-O(7)#8          | 1.491(5)           |
| Mg(2)-O(13)#7         | 2.073(3)           | B(8)-O(9)#6          | 1.482(5)           |
| Mg(2)-O(14)           | 2.048(3)           | B(8)-O(14)           | 1.467(5)           |
| B(1)-O(1)             | 1.367(5)           |                      |                    |
| <b>Chemical bond</b>  | <b>Bond angle</b>  | <b>Chemical bond</b> | <b>Bond angle</b>  |
| O(8)#1-Rb(1A)-O(10)   | 141.5(3)           | O(4)#3-Mg(1)-O(4)    | 91.34(16)          |
| O(8)#1-Rb(1A)-O(10)#1 | 43.33(11)          | O(4)-Mg(1)-O(6)#1    | 85.13(10)          |
| O(8)#1-Rb(1A)-O(10)#2 | 87.6(2)            | O(4)#3-Mg(1)-O(6)#4  | 85.13(10)          |
| O(8)#1-Rb(1A)-O(11)#1 | 85.29(17)          | O(4)#3-Mg(1)-O(6)#1  | 93.52(11)          |
| O(9)-Rb(1A)-O(8)#1    | 98.9(3)            | O(4)-Mg(1)-O(6)#4    | 93.52(11)          |

---

|                        |            |                      |            |
|------------------------|------------|----------------------|------------|
| O(9)-Rb(1A)-O(10)      | 42.97(12)  | O(6)#1-Mg(1)-O(6)#4  | 178.07(16) |
| O(9)-Rb(1A)-O(10)#1    | 141.9(3)   | O(1)#2-Mg(2)-O(3)#5  | 87.44(11)  |
| O(9)-Rb(1A)-O(10)#2    | 74.99(16)  | O(1)#2-Mg(2)-O(5)#6  | 81.08(11)  |
| O(9)-Rb(1A)-O(11)#1    | 174.8(3)   | O(5)#6-Mg(2)-O(3)#5  | 88.59(12)  |
| O(9)-Rb(1A)-O(12)      | 84.75(18)  | O(7)#5-Mg(2)-O(1)#2  | 169.18(12) |
| O(10)#2-Rb(1A)-O(10)   | 86.07(19)  | O(7)#5-Mg(2)-O(3)#5  | 81.76(11)  |
| O(10)#1-Rb(1A)-O(10)   | 175.1(3)   | O(7)#5-Mg(2)-O(5)#6  | 98.02(11)  |
| O(10)#1-Rb(1A)-O(10)#2 | 95.3(3)    | O(13)#7-Mg(2)-O(1)#2 | 92.56(11)  |
| O(11)#1-Rb(1A)-O(10)#2 | 108.5(4)   | O(13)#7-Mg(2)-O(3)#5 | 83.25(11)  |
| O(11)#1-Rb(1A)-O(10)   | 132.5(2)   | O(13)#7-Mg(2)-O(5)#6 | 169.89(12) |
| O(11)#1-Rb(1A)-O(10)#1 | 42.59(12)  | O(13)#7-Mg(2)-O(7)#5 | 86.73(11)  |
| O(12)-Rb(1A)-O(8)#1    | 175.0(6)   | O(14)-Mg(2)-O(1)#2   | 84.50(11)  |
| O(12)-Rb(1A)-O(10)#2   | 90.0(3)    | O(14)-Mg(2)-O(3)#5   | 171.01(14) |
| O(12)-Rb(1A)-O(10)#1   | 132.7(4)   | O(14)-Mg(2)-O(5)#6   | 86.25(11)  |
| O(12)-Rb(1A)-O(10)     | 42.52(11)  | O(14)-Mg(2)-O(7)#5   | 106.24(12) |
| O(12)-Rb(1A)-O(11)#1   | 91.3(2)    | O(14)-Mg(2)-O(13)#7  | 101.04(12) |
| O(8)#1-Rb(1B)-O(8)#2   | 102.07(15) | O(1)-B(1)-O(3)       | 120.2(4)   |
| O(8)#1-Rb(1B)-O(10)#1  | 43.37(9)   | O(2)-B(1)-O(1)       | 120.0(3)   |
| O(8)#1-Rb(1B)-O(10)    | 135.3(2)   | O(2)-B(1)-O(3)       | 119.5(3)   |
| O(8)#1-Rb(1B)-O(10)#2  | 89.46(11)  | O(3)-B(2)-O(5)       | 107.6(3)   |
| O(8)#2-Rb(1B)-O(10)    | 104.44(15) | O(4)-B(2)-O(3)       | 111.8(3)   |
| O(8)#1-Rb(1B)-O(11)#1  | 86.02(13)  | O(4)-B(2)-O(5)       | 106.7(3)   |
| O(9)-Rb(1B)-O(8)#2     | 113.23(14) | O(4)-B(2)-O(8)       | 113.3(3)   |
| O(9)-Rb(1B)-O(8)#1     | 94.46(17)  | O(8)-B(2)-O(3)       | 108.1(3)   |
| O(9)-Rb(1B)-O(10)      | 41.86(10)  | O(8)-B(2)-O(5)       | 109.2(3)   |
| O(9)-Rb(1B)-O(10)#2    | 75.78(10)  | O(6)-B(3)-O(5)       | 120.5(4)   |
| O(9)-Rb(1B)-O(10)#1    | 137.82(19) | O(6)-B(3)-O(7)       | 119.7(4)   |
| O(9)-Rb(1B)-O(11)#1    | 168.3(2)   | O(7)-B(3)-O(5)       | 119.5(3)   |
| O(10)#1-Rb(1B)-O(8)#2  | 82.87(16)  | O(8)-B(4)-O(10)      | 114.2(4)   |
| O(10)#2-Rb(1B)-O(8)#2  | 40.93(10)  | O(9)-B(4)-O(8)       | 125.1(4)   |
| O(10)#1-Rb(1B)-O(10)   | 172.2(2)   | O(9)-B(4)-O(10)      | 120.7(4)   |
| O(10)#2-Rb(1B)-O(10)   | 87.67(11)  | O(11)-B(5)-O(10)     | 117.2(4)   |
| O(10)#2-Rb(1B)-O(10)#1 | 99.80(15)  | O(12)-B(5)-O(10)     | 118.6(4)   |
| O(11)#1-Rb(1B)-O(8)#2  | 77.97(17)  | O(12)-B(5)-O(11)     | 124.0(4)   |
| O(11)#1-Rb(1B)-O(10)#2 | 115.9(2)   | O(1)#8-B(6)-O(6)#9   | 109.0(3)   |

---

|                        |            |                    |          |
|------------------------|------------|--------------------|----------|
| O(11)#1-Rb(1B)-O(10)   | 134.36(13) | O(11)-B(6)-O(1)#8  | 107.5(3) |
| O(11)#1-Rb(1B)-O(10)#1 | 43.71(10)  | O(11)-B(6)-O(6)#9  | 110.1(3) |
| O(12)-Rb(1B)-O(8)#1    | 174.7(3)   | O(13)-B(6)-O(1)#8  | 111.7(3) |
| O(12)-Rb(1B)-O(8)#2    | 83.24(18)  | O(13)-B(6)-O(6)#9  | 106.8(3) |
| O(12)-Rb(1B)-O(9)      | 83.56(14)  | O(13)-B(6)-O(11)   | 111.7(3) |
| O(12)-Rb(1B)-O(10)     | 42.02(9)   | O(12)-B(7)-O(2)#2  | 107.6(3) |
| O(12)-Rb(1B)-O(10)#1   | 138.3(2)   | O(12)-B(7)-O(13)   | 111.2(3) |
| O(12)-Rb(1B)-O(10)#2   | 94.82(17)  | O(13)-B(7)-O(2)#2  | 106.5(3) |
| O(12)-Rb(1B)-O(11)#1   | 94.92(15)  | O(14)-B(7)-O(2)#2  | 108.8(3) |
| O(2)#3-Mg(1)-O(2)      | 98.78(16)  | O(14)-B(7)-O(12)   | 112.8(3) |
| O(2)-Mg(1)-O(6)#4      | 97.57(11)  | O(14)-B(7)-O(13)   | 109.6(3) |
| O(2)#3-Mg(1)-O(6)#1    | 97.57(11)  | O(4)#6-B(8)-O(7)#8 | 111.9(3) |
| O(2)#3-Mg(1)-O(6)#4    | 83.69(11)  | O(4)#6-B(8)-O(9)#6 | 109.4(3) |
| O(2)-Mg(1)-O(6)#1      | 83.69(11)  | O(4)#6-B(8)-O(14)  | 108.0(3) |
| O(4)#3-Mg(1)-O(2)#3    | 84.99(10)  | O(9)#6-B(8)-O(7)#8 | 106.8(3) |
| O(4)-Mg(1)-O(2)        | 84.99(10)  | O(14)-B(8)-O(7)#8  | 106.9(3) |
| O(4)-Mg(1)-O(2)#3      | 175.56(11) | O(14)-B(8)-O(9)#6  | 113.9(3) |
| O(4)#3-Mg(1)-O(2)      | 175.56(11) |                    |          |

Symmetry transformations used to generate equivalent atoms:

|                       |                            |                            |
|-----------------------|----------------------------|----------------------------|
| #1 $x, -y+1, z-1/2$   | #2 $-x+3/2, y-1/2, -z+1/2$ | #3 $-x+1, y, -z+1/2$       |
| #4 $-x+1, -y+1, -z+1$ | #5 $x+1/2, -y+3/2, z-1/2$  | #6 $-x+3/2, y+1/2, -z+1/2$ |
| #7 $-x+2, y, -z+1/2$  | #8 $-x+3/2, -y+3/2, -z+1$  | #9 $-x+3/2, -y+1/2, -z+1$  |

**Table S6.** Anisotropic displacement parameters ( $\text{\AA}^2 \times 10^3$ ) for  $\text{Rb}_2\text{Mg}_3\text{B}_{16}\text{O}_{28}$ .

| Atom   | $U^{11}$ | $U^{22}$ | $U^{33}$ | $U^{23}$ | $U^{13}$ | $U^{12}$ |
|--------|----------|----------|----------|----------|----------|----------|
| Rb(1A) | 26(2)    | 120(5)   | 18(1)    | -7(2)    | -2(1)    | 8(2)     |
| Rb(1B) | 24(1)    | 39(2)    | 19(1)    | -1(1)    | -3(1)    | -5(1)    |
| Mg(1)  | 8(1)     | 10(1)    | 6(1)     | 0        | 0(1)     | 0        |
| Mg(2)  | 10(1)    | 7(1)     | 7(1)     | 1(1)     | 0(1)     | -1(1)    |
| B(1)   | 10(2)    | 4(2)     | 10(2)    | -1(2)    | -2(2)    | 0(2)     |
| B(2)   | 7(2)     | 11(2)    | 6(2)     | 1(2)     | -1(2)    | 2(2)     |
| B(3)   | 7(2)     | 12(2)    | 9(2)     | 2(2)     | 0(2)     | -1(2)    |
| B(4)   | 9(2)     | 13(2)    | 12(2)    | 2(2)     | 0(2)     | 0(2)     |
| B(5)   | 7(2)     | 15(2)    | 14(2)    | -5(2)    | 2(2)     | -1(2)    |
| B(6)   | 14(2)    | 5(2)     | 10(2)    | -4(2)    | 3(2)     | 1(2)     |



|       |       |       |       |       |       |       |
|-------|-------|-------|-------|-------|-------|-------|
| B(7)  | 18(3) | 9(2)  | 4(2)  | 0(2)  | 4(2)  | -2(2) |
| B(8)  | 11(2) | 7(2)  | 8(2)  | 0(2)  | 1(2)  | 1(2)  |
| O(1)  | 15(2) | 6(1)  | 8(2)  | 1(1)  | 1(1)  | 0(1)  |
| O(2)  | 15(2) | 8(1)  | 5(1)  | 0(1)  | -1(1) | 0(1)  |
| O(3)  | 14(1) | 8(1)  | 7(1)  | 2(1)  | 4(1)  | 2(1)  |
| O(4)  | 11(1) | 7(1)  | 5(1)  | -2(1) | 0(1)  | 0(1)  |
| O(5)  | 18(2) | 8(1)  | 7(1)  | 1(1)  | -1(1) | -1(1) |
| O(6)  | 17(2) | 5(1)  | 9(2)  | 0(1)  | 2(1)  | -1(1) |
| O(7)  | 18(2) | 5(1)  | 8(2)  | -1(1) | -1(1) | -2(1) |
| O(8)  | 9(1)  | 21(2) | 12(2) | -4(1) | 0(1)  | -1(1) |
| O(9)  | 12(2) | 14(1) | 12(2) | -3(1) | 4(1)  | 0(1)  |
| O(10) | 9(2)  | 36(2) | 28(2) | -5(2) | 1(1)  | -2(1) |
| O(11) | 10(2) | 22(2) | 15(2) | 3(1)  | 2(1)  | -1(1) |
| O(12) | 10(2) | 15(2) | 12(2) | 0(1)  | 0(1)  | -1(1) |
| O(13) | 10(1) | 7(1)  | 7(1)  | -1(1) | -1(1) | 1(1)  |
| O(14) | 17(2) | 4(1)  | 8(1)  | -2(1) | 2(1)  | -1(1) |

**Table S7.** Atomic coordinates ( $\times 10^4$ ), equivalent isotropic displacement parameters ( $\text{\AA}^2 \times 10^3$ ) and the BVS calculations for  $\text{Cs}_2\text{Mg}_3\text{B}_{16}\text{O}_{28}$ .  $U_{\text{eq}}$  is defined as 1/3 of the trace of the orthogonalised  $U_{ij}$  tensor.

| Atom   | x       | y       | z       | U(eq) | BVS  |
|--------|---------|---------|---------|-------|------|
| Cs(1A) | 2486(2) | 5384(3) | 9093(3) | 27(1) | 1.07 |
| Cs(1B) | 2529(1) | 4774(2) | 9103(2) | 39(1) | 1.01 |
| Mg(1)  | 5000    | 2490(3) | 7500    | 10(1) | 1.97 |
| Mg(2)  | 10(1)   | 2472(2) | 9040(1) | 10(1) | 1.94 |
| B(1)   | 4120(3) | 5762(7) | 7452(4) | 10(1) | 3.03 |
| B(2)   | 4163(2) | 4113(7) | 5819(4) | 8(1)  | 3.08 |
| B(3)   | 3147(3) | 4765(8) | 6602(4) | 15(1) | 3.09 |
| B(4)   | 1865(2) | 4929(8) | 6616(4) | 15(1) | 3.10 |
| B(5)   | 877(3)  | 4180(7) | 7494(4) | 11(1) | 3.02 |
| B(6)   | 866(2)  | 5806(7) | 5840(4) | 10(1) | 3.09 |
| B(7)   | 684(2)  | 9180(7) | 5848(4) | 11(1) | 3.04 |
| B(8)   | 647(3)  | 4182(7) | 4193(4) | 11(1) | 3.00 |

|       |         |          |         |       |      |
|-------|---------|----------|---------|-------|------|
| O(1)  | 4425(2) | 4407(4)  | 6834(2) | 9(1)  | 1.94 |
| O(2)  | 3429(2) | 5535(5)  | 7416(3) | 15(1) | 2.04 |
| O(3)  | 3475(2) | 4016(5)  | 5824(3) | 14(1) | 2.01 |
| O(4)  | 2501(2) | 4652(6)  | 6523(3) | 30(1) | 2.23 |
| O(5)  | 1570(2) | 4336(5)  | 7457(3) | 15(1) | 2.05 |
| O(6)  | 672(2)  | 2503(4)  | 7910(2) | 10(1) | 1.96 |
| O(7)  | 600(2)  | 4437(4)  | 6471(2) | 9(1)  | 1.94 |
| O(8)  | 1558(2) | 5738(5)  | 5828(3) | 15(1) | 2.00 |
| O(9)  | 658(2)  | 7535(4)  | 6270(2) | 11(1) | 2.04 |
| O(10) | 678(2)  | 10643(4) | 6450(2) | 11(1) | 2.06 |
| O(11) | 629(2)  | 9366(4)  | 4809(2) | 11(1) | 2.01 |
| O(12) | 625(2)  | 5669(4)  | 4787(2) | 11(1) | 2.06 |
| O(13) | 642(2)  | 4322(4)  | 3158(2) | 10(1) | 2.02 |
| O(14) | 589(2)  | 2538(4)  | 4632(2) | 10(1) | 2.01 |

**Table S8.** Selected bond lengths (Å) and angles (°) for Cs<sub>2</sub>Mg<sub>3</sub>B<sub>16</sub>O<sub>28</sub>.

| Chemical bond | Bond length | Chemical bond | Bond length |
|---------------|-------------|---------------|-------------|
| Cs(1A)-O(2)   | 2.992(5)    | B(1)-O(1)     | 1.461(6)    |
| Cs(1A)-O(3)#1 | 3.410(4)    | B(1)-O(2)     | 1.464(6)    |
| Cs(1A)-O(3)#2 | 3.100(5)    | B(1)-O(6)#1   | 1.467(6)    |
| Cs(1A)-O(4)   | 3.430(6)    | B(1)-O(10)#3  | 1.504(6)    |
| Cs(1A)-O(4)#1 | 3.322(5)    | B(2)-O(1)     | 1.456(6)    |
| Cs(1A)-O(4)#2 | 3.200(6)    | B(2)-O(3)     | 1.453(6)    |
| Cs(1A)-O(5)   | 2.981(5)    | B(2)-O(11)#13 | 1.484(6)    |
| Cs(1A)-O(8)#2 | 3.143(5)    | B(2)-O(14)#6  | 1.478(6)    |
| Cs(1B)-O(2)   | 2.996(4)    | B(3)-O(2)     | 1.350(7)    |
| Cs(1B)-O(3)#2 | 3.133(4)    | B(3)-O(3)     | 1.364(7)    |
| Cs(1B)-O(4)#1 | 3.773(5)    | B(3)-O(4)     | 1.367(6)    |
| Cs(1B)-O(4)#2 | 3.218(5)    | B(4)-O(4)     | 1.362(6)    |
| Cs(1B)-O(4)   | 3.399(5)    | B(4)-O(5)     | 1.354(6)    |
| Cs(1B)-O(5)   | 2.963(4)    | B(4)-O(8)     | 1.360(7)    |
| Cs(1B)-O(8)#3 | 3.603(4)    | B(5)-O(5)     | 1.465(6)    |
| Cs(1B)-O(8)#2 | 3.101(4)    | B(5)-O(6)     | 1.447(6)    |
| Mg(1)-O(1)    | 2.075(4)    | B(5)-O(7)     | 1.473(6)    |
| Mg(1)-O(1)#4  | 2.075(4)    | B(5)-O(13)#2  | 1.517(6)    |

| Mg(1)-O(9)#5         | 2.146(3)   | B(6)-O(7)             | 1.444(6)   |
|----------------------|------------|-----------------------|------------|
| Mg(1)-O(9)#3         | 2.146(3)   | B(6)-O(8)             | 1.457(6)   |
| Mg(1)-O(13)#6        | 2.101(4)   | B(6)-O(9)             | 1.491(6)   |
| Mg(1)-O(13)#7        | 2.101(4)   | B(6)-O(12)            | 1.475(6)   |
| Mg(2)-O(6)           | 2.052(4)   | B(7)-O(9)             | 1.362(6)   |
| Mg(2)-O(7)#8         | 2.070(4)   | B(7)-O(10)            | 1.360(6)   |
| Mg(2)-O(10)#9        | 2.097(4)   | B(7)-O(11)            | 1.378(6)   |
| Mg(2)-O(11)#2        | 2.149(4)   | B(8)-O(12)            | 1.369(6)   |
| Mg(2)-O(12)#2        | 2.140(4)   | B(8)-O(13)            | 1.367(6)   |
| Mg(2)-O(14)#8        | 2.171(4)   | B(8)-O(14)            | 1.375(6)   |
| Chemical bond        | Bond angle | Chemical bond         | Bond angle |
| O(2)-Cs(1A)-O(3)#2   | 95.26(15)  | O(1)#4-Mg(1)-O(13)#6  | 175.64(15) |
| O(2)-Cs(1A)-O(3)#1   | 113.12(13) | O(1)-Mg(1)-O(13)#7    | 175.64(15) |
| O(2)-Cs(1A)-O(4)#2   | 137.82(16) | O(1)-Mg(1)-O(13)#6    | 84.87(12)  |
| O(2)-Cs(1A)-O(4)#1   | 76.99(12)  | O(1)#4-Mg(1)-O(13)#7  | 84.87(12)  |
| O(2)-Cs(1A)-O(4)     | 42.51(10)  | O(9)#3-Mg(1)-O(9)#5   | 178.2(2)   |
| O(2)-Cs(1A)-O(8)#2   | 166.49(13) | O(13)#6-Mg(1)-O(9)#3  | 84.47(13)  |
| O(3)#2-Cs(1A)-O(3)#1 | 104.61(11) | O(13)#7-Mg(1)-O(9)#3  | 96.74(13)  |
| O(3)#2-Cs(1A)-O(4)#2 | 42.97(10)  | O(13)#6-Mg(1)-O(9)#5  | 96.74(13)  |
| O(3)#2-Cs(1A)-O(4)#1 | 91.75(13)  | O(13)#7-Mg(1)-O(9)#5  | 84.47(13)  |
| O(3)#2-Cs(1A)-O(4)   | 137.27(16) | O(13)#6-Mg(1)-O(13)#7 | 98.8(2)    |
| O(3)#1-Cs(1A)-O(4)   | 100.01(13) | O(6)-Mg(2)-O(7)#8     | 100.43(14) |
| O(3)#2-Cs(1A)-O(8)#2 | 85.59(13)  | O(6)-Mg(2)-O(10)#9    | 104.94(14) |
| O(4)#2-Cs(1A)-O(3)#1 | 88.45(13)  | O(6)-Mg(2)-O(11)#2    | 86.31(14)  |
| O(4)#1-Cs(1A)-O(3)#1 | 40.10(9)   | O(6)-Mg(2)-O(12)#2    | 85.02(14)  |
| O(4)#2-Cs(1A)-O(4)#1 | 104.63(12) | O(6)-Mg(2)-O(14)#8    | 172.52(15) |
| O(4)#2-Cs(1A)-O(4)   | 170.20(8)  | O(7)#8-Mg(2)-O(10)#9  | 86.99(13)  |
| O(4)#1-Cs(1A)-O(4)   | 85.10(11)  | O(7)#8-Mg(2)-O(11)#2  | 170.63(15) |
| O(5)-Cs(1A)-O(2)     | 84.61(14)  | O(7)#8-Mg(2)-O(12)#2  | 92.82(14)  |
| O(5)-Cs(1A)-O(3)#2   | 173.01(13) | O(7)#8-Mg(2)-O(14)#8  | 83.13(14)  |
| O(5)-Cs(1A)-O(3)#1   | 81.79(12)  | O(10)#9-Mg(2)-O(11)#2 | 97.62(14)  |
| O(5)-Cs(1A)-O(4)#1   | 95.03(13)  | O(10)#9-Mg(2)-O(12)#2 | 169.92(15) |
| O(5)-Cs(1A)-O(4)     | 42.10(10)  | O(10)#9-Mg(2)-O(14)#8 | 81.72(14)  |
| O(5)-Cs(1A)-O(4)#2   | 135.92(17) | O(11)#2-Mg(2)-O(14)#8 | 89.45(13)  |
| O(5)-Cs(1A)-O(8)#2   | 92.92(14)  | O(12)#2-Mg(2)-O(11)#2 | 81.20(13)  |

---

|                      |            |                       |           |
|----------------------|------------|-----------------------|-----------|
| O(8)#2-Cs(1A)-O(3)#1 | 79.53(12)  | O(12)#2-Mg(2)-O(14)#8 | 88.25(14) |
| O(8)#2-Cs(1A)-O(4)#2 | 43.01(10)  | O(1)-B(1)-O(2)        | 110.1(4)  |
| O(8)#2-Cs(1A)-O(4)#1 | 116.49(13) | O(1)-B(1)-O(6)#1      | 108.0(4)  |
| O(8)#2-Cs(1A)-O(4)   | 133.44(15) | O(1)-B(1)-O(10)#3     | 111.9(4)  |
| O(2)-Cs(1B)-O(3)#2   | 94.50(11)  | O(2)-B(1)-O(6)#1      | 113.3(4)  |
| O(2)-Cs(1B)-O(4)#1   | 70.10(10)  | O(2)-B(1)-O(10)#3     | 107.1(4)  |
| O(2)-Cs(1B)-O(4)     | 42.81(10)  | O(6)#1-B(1)-O(10)#3   | 106.5(4)  |
| O(2)-Cs(1B)-O(4)#2   | 136.82(13) | O(1)-B(2)-O(11)#13    | 106.5(4)  |
| O(2)-Cs(1B)-O(8)#3   | 80.67(10)  | O(1)-B(2)-O(14)#6     | 111.5(4)  |
| O(2)-Cs(1B)-O(8)#2   | 175.83(12) | O(3)-B(2)-O(1)        | 111.6(4)  |
| O(3)#2-Cs(1B)-O(4)#1 | 83.26(10)  | O(3)-B(2)-O(11)#13    | 110.1(4)  |
| O(3)#2-Cs(1B)-O(4)#2 | 42.62(10)  | O(3)-B(2)-O(14)#6     | 108.5(4)  |
| O(3)#2-Cs(1B)-O(4)   | 137.19(12) | O(14)#6-B(2)-O(11)#13 | 108.7(4)  |
| O(3)#2-Cs(1B)-O(8)#3 | 83.93(10)  | O(2)-B(3)-O(3)        | 123.5(5)  |
| O(4)-Cs(1B)-O(4)#1   | 78.92(10)  | O(2)-B(3)-O(4)        | 120.9(5)  |
| O(4)#2-Cs(1B)-O(4)   | 173.49(7)  | O(3)-B(3)-O(4)        | 115.5(5)  |
| O(4)#2-Cs(1B)-O(4)#1 | 94.87(11)  | O(5)-B(4)-O(4)        | 119.0(5)  |
| O(4)#2-Cs(1B)-O(8)#3 | 96.07(11)  | O(5)-B(4)-O(8)        | 123.6(4)  |
| O(4)-Cs(1B)-O(8)#3   | 90.25(11)  | O(8)-B(4)-O(4)        | 117.4(5)  |
| O(5)-Cs(1B)-O(2)     | 84.86(11)  | O(5)-B(5)-O(7)        | 109.9(4)  |
| O(5)-Cs(1B)-O(3)#2   | 169.34(12) | O(5)-B(5)-O(13)#2     | 107.0(4)  |
| O(5)-Cs(1B)-O(4)#2   | 135.94(13) | O(6)-B(5)-O(5)        | 112.6(4)  |
| O(5)-Cs(1B)-O(4)#1   | 86.53(10)  | O(6)-B(5)-O(7)        | 110.2(4)  |
| O(5)-Cs(1B)-O(4)     | 42.48(10)  | O(6)-B(5)-O(13)#2     | 109.4(4)  |
| O(5)-Cs(1B)-O(8)#2   | 94.13(12)  | O(7)-B(5)-O(13)#2     | 107.5(4)  |
| O(5)-Cs(1B)-O(8)#3   | 106.42(11) | O(7)-B(6)-O(8)        | 112.1(4)  |
| O(8)#2-Cs(1B)-O(3)#2 | 85.74(11)  | O(7)-B(6)-O(9)        | 106.8(4)  |
| O(8)#2-Cs(1B)-O(4)   | 136.54(12) | O(7)-B(6)-O(12)       | 111.1(4)  |
| O(8)#2-Cs(1B)-O(4)#2 | 43.14(10)  | O(8)-B(6)-O(9)        | 109.5(4)  |
| O(8)#3-Cs(1B)-O(4)#1 | 146.90(11) | O(8)-B(6)-O(12)       | 108.6(4)  |
| O(8)#2-Cs(1B)-O(4)#1 | 105.82(10) | O(12)-B(6)-O(9)       | 108.6(4)  |
| O(8)#2-Cs(1B)-O(8)#3 | 103.49(9)  | O(9)-B(7)-O(11)       | 119.7(4)  |
| O(1)#4-Mg(1)-O(1)    | 91.5(2)    | O(10)-B(7)-O(9)       | 120.1(4)  |
| O(1)#4-Mg(1)-O(9)#3  | 92.82(13)  | O(10)-B(7)-O(11)      | 119.7(4)  |
| O(1)#4-Mg(1)-O(9)#5  | 85.89(13)  | O(12)-B(8)-O(14)      | 119.7(4)  |

---

|                   |           |                  |          |
|-------------------|-----------|------------------|----------|
| O(1)-Mg(1)-O(9)#3 | 85.89(13) | O(13)-B(8)-O(12) | 120.4(4) |
| O(1)-Mg(1)-O(9)#5 | 92.82(13) | O(13)-B(8)-O(14) | 119.3(4) |

Symmetry transformations used to generate equivalent atoms:

|                       |                            |                            |
|-----------------------|----------------------------|----------------------------|
| #1 $x, -y+1, z+1/2$   | #2 $-x+1/2, y+1/2, -z+3/2$ | #3 $-x+1/2, y-1/2, -z+3/2$ |
| #4 $x+1/2, y-1/2, z$  | #5 $-x+1/2, -y+1/2, -z+1$  | #6 $x+1/2, -y+1/2, z+1/2$  |
| #7 $-x+1, y, -z+3/2$  | #8 $-x, y-1, -z+3/2$       | #9 $-x, y, -z+3/2$         |
| #13 $-x, y+1, -z+3/2$ |                            |                            |

**Table S9.** Anisotropic displacement parameters ( $\text{\AA}^2 \times 10^3$ ) for  $\text{Cs}_2\text{Mg}_3\text{B}_{16}\text{O}_{28}$ .

| Atom   | $U^{11}$ | $U^{22}$ | $U^{33}$ | $U^{23}$ | $U^{13}$ | $U^{12}$ |
|--------|----------|----------|----------|----------|----------|----------|
| Cs(1A) | 27(1)    | 42(1)    | 14(1)    | -1(1)    | -1(1)    | -2(1)    |
| Cs(1B) | 25(1)    | 79(1)    | 13(1)    | 0(1)     | -1(1)    | -7(1)    |
| Mg(1)  | 11(1)    | 10(1)    | 9(1)     | 0        | -1(1)    | 0        |
| Mg(2)  | 11(1)    | 9(1)     | 10(1)    | 1(1)     | -1(1)    | 0(1)     |
| B(1)   | 18(3)    | 10(3)    | 2(2)     | 0(2)     | -2(2)    | 2(2)     |
| B(2)   | 11(2)    | 10(3)    | 4(2)     | -1(2)    | 2(2)     | 0(2)     |
| B(3)   | 12(2)    | 18(3)    | 17(3)    | 5(2)     | 1(2)     | -4(2)    |
| B(4)   | 8(2)     | 21(3)    | 16(3)    | -4(2)    | 3(2)     | 1(2)     |
| B(5)   | 15(3)    | 9(3)     | 8(2)     | 1(2)     | -5(2)    | 0(2)     |
| B(6)   | 10(2)    | 11(3)    | 8(2)     | -2(2)    | 2(2)     | 0(2)     |
| B(7)   | 9(2)     | 11(3)    | 12(3)    | 1(2)     | -2(2)    | 1(2)     |
| B(8)   | 11(2)    | 13(3)    | 10(3)    | -1(2)    | -2(2)    | -2(2)    |
| O(1)   | 11(2)    | 9(2)     | 7(2)     | -1(1)    | -1(1)    | 2(1)     |
| O(2)   | 14(2)    | 19(2)    | 11(2)    | -3(1)    | 5(1)     | -2(1)    |
| O(3)   | 8(2)     | 23(2)    | 13(2)    | -2(1)    | 0(1)     | -1(1)    |
| O(4)   | 9(2)     | 59(3)    | 23(2)    | -3(2)    | 1(2)     | 0(2)     |
| O(5)   | 10(2)    | 22(2)    | 12(2)    | 0(1)     | -3(1)    | 0(1)     |
| O(6)   | 15(2)    | 9(2)     | 6(2)     | 1(1)     | 0(1)     | 1(1)     |
| O(7)   | 10(2)    | 10(2)    | 8(2)     | 2(1)     | -1(1)    | 0(1)     |
| O(8)   | 8(2)     | 22(2)    | 14(2)    | 2(1)     | 1(1)     | -2(1)    |
| O(9)   | 21(2)    | 8(2)     | 5(2)     | -1(1)    | 1(1)     | 1(1)     |
| O(10)  | 18(2)    | 9(2)     | 5(2)     | 1(1)     | -2(1)    | 0(1)     |
| O(11)  | 20(2)    | 9(2)     | 5(2)     | 0(1)     | 2(1)     | -1(1)    |
| O(12)  | 18(2)    | 9(2)     | 5(2)     | 1(1)     | -1(1)    | 2(1)     |
| O(13)  | 15(2)    | 9(2)     | 7(2)     | -1(1)    | 1(1)     | -2(1)    |

O(14)

17(2)

11(2)

4(1)

0(1)

2(1)

1(1)

---

**Table S10.** Basic information on anhydrous alkali and/or alkaline-earth metal Mg-containing borates.

| No. | Cation                     | Compound                                                                                  | Space group  | Anion framework dimensions                                               | $N_{\text{cation}}/N_{\text{B}}$ |
|-----|----------------------------|-------------------------------------------------------------------------------------------|--------------|--------------------------------------------------------------------------|----------------------------------|
| 1.  | <b>Mg</b>                  | $\text{Mg}_3(\text{BO}_3)\text{F}_3$                                                      | $P6_3/m$     | 0D cluster, $[\text{BO}_3]$                                              | 3                                |
| 2.  |                            | $\text{Mg}_2(\text{BO}_3)\text{F}$                                                        | $Pnam$       | 0D cluster, $[\text{BO}_3]$                                              | 2                                |
| 3.  |                            | $\text{Mg}_2(\text{BO}_3)_{1.14}\text{F}_{0.58}$                                          | $Pna2_1$     | 0D cluster, $[\text{BO}_3]$                                              | 1.75                             |
| 4.  |                            | $\text{Mg}_5(\text{BO}_3)_3\text{F}$                                                      | $Pnma$       | 0D cluster, $[\text{BO}_3]$                                              | 1.67                             |
| 5.  |                            | $\text{Mg}_5(\text{BO}_3)_3\text{F}$                                                      | $Pna2_1$     | 0D cluster, $[\text{BO}_3]$                                              | 1.67                             |
| 6.  |                            | $\text{Mg}_3(\text{BO}_3)_2$                                                              | $Pnnm$       | 0D cluster, $[\text{BO}_3]$                                              | 1.5                              |
| 7.  |                            | $\text{Mg}_2(\text{B}_2\text{O}_5)$                                                       | $P2_1/c$     | 0D cluster, $[\text{B}_2\text{O}_5]$                                     | 1                                |
| 8.  |                            | $\text{Mg}_2(\text{B}_2\text{O}_5)$                                                       | $P\bar{1}$   | 0D cluster, $[\text{B}_2\text{O}_5]$                                     | 1                                |
| 9.  |                            | $\text{Mg}_3(\text{B}_7\text{O}_{13}\text{Cl})$                                           | $F\bar{4}3c$ | 3D network                                                               | 0.43                             |
| 10. |                            | $\text{Mg}_3(\text{B}_7\text{O}_{13}\text{Cl})$                                           | $Pca2_1$     | 3D network                                                               | 0.43                             |
| 11. |                            | $\text{MgO}(\text{B}_2\text{O}_3)_2$                                                      | $Pbca$       | 3D network                                                               | 0.25                             |
| 12. | <b>Alkali metal and Mg</b> | $\text{LiMg}(\text{BO}_3)$                                                                | $C2/c$       | 0D cluster, $[\text{BO}_3]$                                              | 2                                |
| 13. |                            | $\text{NaMgBO}_3$                                                                         | $C2/c$       | 0D cluster, $[\text{BO}_3]$                                              | 2                                |
| 14. |                            | $\text{KMg}(\text{BO}_3)$                                                                 | $P2_13$      | 0D cluster, $[\text{BO}_3]$                                              | 2                                |
| 15. |                            | $\text{RbMg}(\text{BO}_3)$                                                                | $P2_13$      | 0D cluster, $[\text{BO}_3]$                                              | 2                                |
| 16. |                            | $\text{Cs}_4\text{Mg}_4(\text{BO}_3)_4$                                                   | $P2_1/c$     | 0D cluster, $[\text{BO}_3]$                                              | 2                                |
| 17. |                            | $\text{K}_{0.83}\text{Na}_{0.17}\text{Mg}(\text{BO}_3)$                                   | $P2_13$      | 0D cluster, $[\text{BO}_3]$                                              | 2                                |
| 18. |                            | $\text{K}_{0.92}\text{Na}_{0.08}\text{Mg}(\text{BO}_3)$                                   | $P2_13$      | 0D cluster, $[\text{BO}_3]$                                              | 2                                |
| 19. |                            | $\text{Li}_{0.8}\text{Mg}_{2.1}\text{B}_2\text{O}_5\text{F}$                              | $P2_1/n$     | 0D cluster, $[\text{B}_2\text{O}_5]$                                     | 1.5                              |
| 20. |                            | $\text{Rb}_{18}\text{Mg}_6(\text{B}_5\text{O}_{10})_3(\text{B}_7\text{O}_{14})_2\text{F}$ | $C2/c$       | 0D cluster, $[\text{B}_5\text{O}_{10}]^+$<br>$[\text{B}_7\text{O}_{14}]$ | 0.83                             |
| 21. |                            | $\text{Cs}_{18}\text{Mg}_6(\text{B}_5\text{O}_{10})_3(\text{B}_7\text{O}_{14})_2\text{F}$ | $C2/c$       | 0D cluster, $[\text{B}_5\text{O}_{10}]^+$<br>$[\text{B}_7\text{O}_{14}]$ | 0.83                             |

|     |                                                                         |                                                                       |                                                                              |                                            |                             |
|-----|-------------------------------------------------------------------------|-----------------------------------------------------------------------|------------------------------------------------------------------------------|--------------------------------------------|-----------------------------|
| 22. |                                                                         | $\text{Na}_3\text{Mg}(\text{B}_5\text{O}_{10})$                       | <i>Pbca</i>                                                                  | OD cluster, $[\text{B}_5\text{O}_{10}]$    | 0.8                         |
| 23. |                                                                         | <b>*<math>\text{Rb}_2\text{Mg}_3\text{B}_{16}\text{O}_{28}</math></b> | <i>C2/c</i>                                                                  | <b>2D bilayer</b>                          | <b>0.31</b>                 |
| 24. |                                                                         | <b>*<math>\text{Cs}_2\text{Mg}_3\text{B}_{16}\text{O}_{28}</math></b> | <i>C2/c</i>                                                                  | <b>2D bilayer</b>                          | <b>0.31</b>                 |
| 25. | <b>Alkaline-earth metal and Mg</b>                                      | $\text{BaMg}(\text{BO}_3)\text{F}$                                    | <i>Cc</i>                                                                    | OD cluster, $[\text{BO}_3]$                | 2                           |
| 26. |                                                                         | $\text{BaMgBe}_2(\text{BO}_3)_2\text{F}$                              | $\bar{P}3c1$                                                                 | OD cluster, $[\text{BO}_3]$                | 2                           |
| 27. |                                                                         | $\text{Ba}_2\text{Mg}(\text{BO}_3)_2$                                 | $R\bar{3}m$                                                                  | OD cluster, $[\text{BO}_3]$                | 1.5                         |
| 28. |                                                                         | $\text{MgSrB}_2\text{O}_5$                                            | <i>P2<sub>1</sub>/c</i>                                                      | OD cluster, $[\text{B}_2\text{O}_5]$       | 1.5                         |
| 29. |                                                                         | $\text{Sr}_2\text{Mg}(\text{BO}_3)_2$                                 | <i>C2/m</i>                                                                  | OD cluster, $[\text{BO}_3]$                | 1.5                         |
| 30. |                                                                         | $\text{CaMg}(\text{B}_2\text{O}_5)$                                   | <i>Pc2<sub>1</sub>b</i>                                                      | OD cluster, $[\text{B}_2\text{O}_5]$       | 1                           |
| 31. |                                                                         | $\text{CaMg}(\text{B}_2\text{O}_5)$                                   | <i>Pbca</i>                                                                  | OD cluster, $[\text{B}_2\text{O}_5]$       | 1                           |
| 32. |                                                                         | $\text{CaMg}(\text{B}_2\text{O}_5)$                                   | <i>P2<sub>1</sub>/c</i>                                                      | OD cluster, $[\text{B}_2\text{O}_5]$       | 1                           |
| 33. |                                                                         | $\text{Sr}_8\text{MgB}_{18}\text{O}_{36}$                             | $R\bar{3}C$                                                                  | OD cluster, $[\text{B}_{18}\text{O}_{36}]$ | 0.5                         |
| 34. |                                                                         | $\text{Ba}_2\text{MgB}_6\text{O}_{12}$                                | $R\bar{3}$                                                                   | OD cluster, $[\text{B}_3\text{O}_6]$       | 0.5                         |
| 35. |                                                                         | $\text{Ca}_{0.88}\text{Mg}_{0.12}\text{B}_5\text{O}_7\text{F}_3$      | <i>Cmc2<sub>1</sub></i>                                                      | 2D monolayer                               | 0.2                         |
| 36. |                                                                         | $\text{Ca}_{0.9}\text{Mg}_{0.1}\text{B}_5\text{O}_7\text{F}_3$        | <i>Cmc2<sub>1</sub></i>                                                      | 2D monolayer                               | 0.2                         |
| 37. |                                                                         | $\text{Ca}_{0.92}\text{Mg}_{0.08}\text{B}_5\text{O}_7\text{F}_3$      | <i>Cmc2<sub>1</sub></i>                                                      | 2D monolayer                               | 0.2                         |
| 38. |                                                                         | $\text{Ca}_{0.925}\text{Mg}_{0.075}\text{B}_5\text{O}_7\text{F}_3$    | <i>Cmc2<sub>1</sub></i>                                                      | 2D monolayer                               | 0.2                         |
| 39. |                                                                         | $\text{Ca}_{0.93}\text{Mg}_{0.07}\text{B}_5\text{O}_7\text{F}_3$      | <i>Cmc2<sub>1</sub></i>                                                      | 2D monolayer                               | 0.2                         |
| 40. |                                                                         | $\text{Ca}_{0.94}\text{Mg}_{0.06}\text{B}_5\text{O}_7\text{F}_3$      | <i>Cmc2<sub>1</sub></i>                                                      | 2D monolayer                               | 0.2                         |
| 41. |                                                                         | <b>Alkali, alkaline-earth metal, and Mg</b>                           | $\text{Li}_{13}(\text{Be}_{0.55}\text{Mg}_{0.45})\text{Be}_6(\text{BO}_3)_9$ | <i>P6<sub>3</sub>/m</i>                    | OD cluster, $[\text{BO}_3]$ |
| 42. | $\text{KBa}_7\text{Mg}_2\text{B}_{14}\text{O}_{28}\text{F}_5$           |                                                                       | <i>C2/c</i>                                                                  | OD cluster, $[\text{B}_7\text{O}_{14}]$    | 0.71                        |
| 43. | $\text{NaBa}_7\text{Mg}_2\text{B}_{14}\text{O}_{28}\text{F}_5$          |                                                                       | <i>C2/c</i>                                                                  | OD cluster, $[\text{B}_7\text{O}_{14}]$    | 0.71                        |
| 44. | <b>*<math>\text{Li}_4\text{Mg}_3\text{SrB}_{12}\text{O}_{24}</math></b> |                                                                       | $R\bar{3}$                                                                   | <b>1D chain</b>                            | <b>0.67</b>                 |

Note: (1) The title compounds are marked with \* and boldfaced style.

(2) The natural mineral and mixed anions structures are not included.



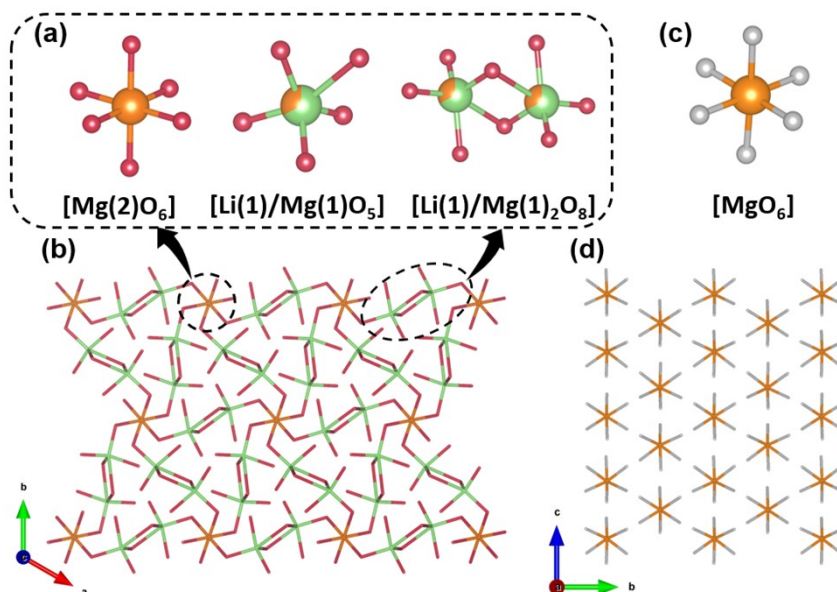

**Figure S1.** (a) The coordination environments of Mg atoms, and (b) the connections between [Li(1)/Mg(1)<sub>2</sub>O<sub>8</sub>] dimers and [Mg(2)O<sub>6</sub>] polyhedra of Li<sub>4</sub>Mg<sub>3</sub>SrB<sub>12</sub>O<sub>24</sub>. (c) the coordination environment of Mg atom, and (d) isolated [MgO<sub>6</sub>] polyhedra of Cs<sub>2</sub>Mg<sub>3</sub>B<sub>16</sub>O<sub>28</sub>.

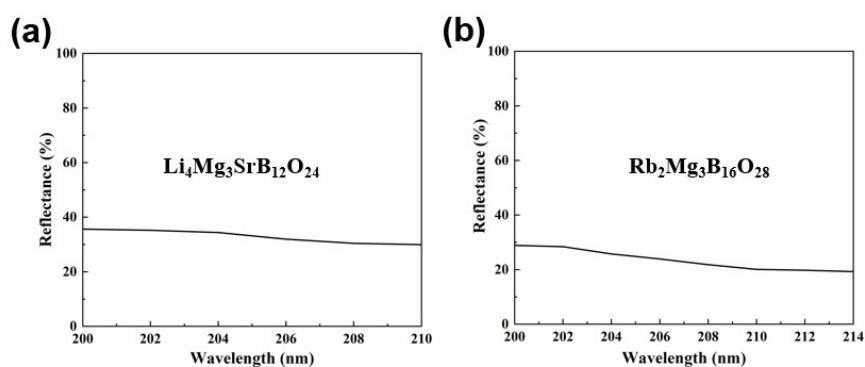

**Figure S2.** The UV-Vis-NIR diffuse reflectance spectroscopy curves in 200-210 nm of (a) Li<sub>4</sub>Mg<sub>3</sub>SrB<sub>12</sub>O<sub>24</sub>, and 200-214 nm of (b) Rb<sub>2</sub>Mg<sub>3</sub>B<sub>16</sub>O<sub>28</sub>.

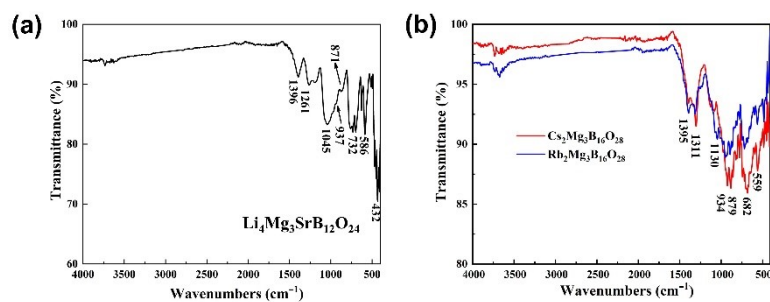

**Figure S3.** The IR spectra of (a)  $\text{Li}_4\text{Mg}_3\text{SrB}_{12}\text{O}_{24}$ , (b)  $\text{A}_2\text{Mg}_3\text{B}_{16}\text{O}_{28}$  (A = Rb, Cs).

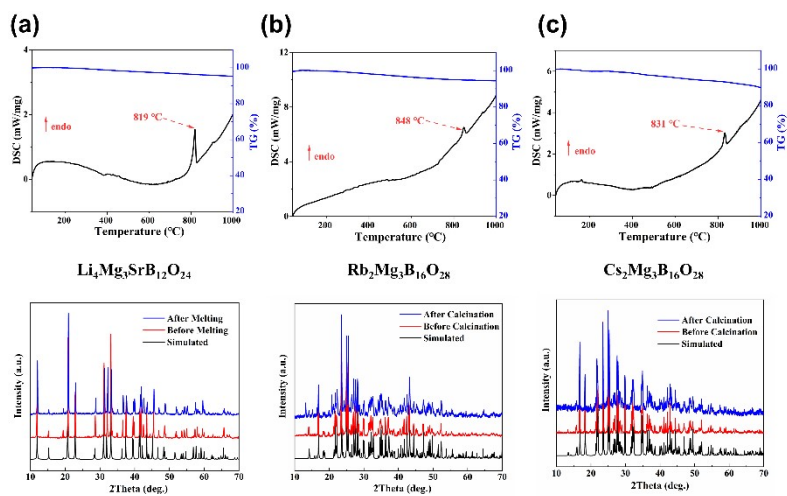

**Figure S4.** The TG-DSC curves and XRD patterns of the simulated, and before and after melting samples of (a)  $\text{Li}_4\text{Mg}_3\text{SrB}_{12}\text{O}_{24}$ , (b)  $\text{Rb}_2\text{Mg}_3\text{B}_{16}\text{O}_{28}$ , and (c)  $\text{Cs}_2\text{Mg}_3\text{B}_{16}\text{O}_{28}$ .
